# Supplementary material for: Targeted Next-Generation Sequencing Identified Compound Heterozygous Mutations in MYO15A as the Probable Cause of Nonsyndromic Deafness in a Chinese Han Family
Source: Neural Plast. 2020 Jun 15;2020:6350479. doi: 10.1155/2020/6350479 (PMC7313121; doi:10.1155/2020/6350479)
Supplement: Supplementary Materials — Supplementary Table 1: the 140 deafness-causative genes for targeted next-generation sequencing. [file 6350479.f1.docx]

**Supplementary Table S1.** 140 genes targeted for the next-generation sequencing

| [*ACTG1*](http://www.ncbi.nlm.nih.gov/omim/102560)*N* | *CO1S* | *FGF8S* | *miR-182N* | [*MYH9*](http://www.ncbi.nlm.nih.gov/omim/160775)*N/S* | *PROK2S* | [*TBC1D24*](http://www.omim.org/entry/613577)*N/S* |
| --- | --- | --- | --- | --- | --- | --- |
| *ALX3S* | [*COL9A1*](http://www.ncbi.nlm.nih.gov/omim/120210)*S* | *FGFR1S* | [*HSD17B4*](http://omim.org/entry/601860)*S* | *miR-183S* | *PROKR2S* | [*TCOF1*](http://www.ncbi.nlm.nih.gov/omim/606847)*S* |
| [*BSND*](http://www.ncbi.nlm.nih.gov/omim/606412)*S* | [*COL9A2*](http://omim.org/entry/120260)*S* | *FGFR3S* | *IL13S* | [*MYO15A*](http://www.ncbi.nlm.nih.gov/omim/602666)*N* | [*PRPS1*](http://www.ncbi.nlm.nih.gov/omim/311850)*S* | [*TECTA*](http://www.ncbi.nlm.nih.gov/omim/602574)*N* |
| *CABP2N* | *COMT2S* | *FLNAS* | [*ILDR1*](http://www.ncbi.nlm.nih.gov/omim/609739)*N* | [*MYO3A*](http://www.ncbi.nlm.nih.gov/omim/606808)*N* | [*PTPRQ*](http://omim.org/entry/603317)*N* | *TIMM8AS* |
| [*CCDC50*](http://www.ncbi.nlm.nih.gov/omim/611051)*N* | [*CRYM*](http://www.ncbi.nlm.nih.gov/omim/123740)*N* | [*FOXI1*](http://www.ncbi.nlm.nih.gov/omim/601093)*S* | [*KARS*](http://omim.org/entry/601421)*N/S* | [*MYO6*](http://www.ncbi.nlm.nih.gov/omim/600970)*N* | [*RDX*](http://www.ncbi.nlm.nih.gov/omim/179410)*N* | [*TJP2*](http://www.ncbi.nlm.nih.gov/omim/607709)*N* |
| [*CDH23*](http://www.ncbi.nlm.nih.gov/omim/605516)*N/S* | [*DFNA5*](http://www.ncbi.nlm.nih.gov/omim/600994)*N* | *FREM1S* | [*KCNE1*](http://www.ncbi.nlm.nih.gov/omim/176261)*S* | [*MYO7A*](http://www.ncbi.nlm.nih.gov/omim/276903)*N/S* | *RPGRS* | [*TMC1*](http://www.ncbi.nlm.nih.gov/omim/606706)*N* |
| [*CEACAM16*](http://www.ncbi.nlm.nih.gov/pubmed/21368133)*N* | *DFNB59N* | *GATA3S* | [*KCNJ10*](http://omim.org/entry/602208)*N/S* | [*NDP*](http://www.ncbi.nlm.nih.gov/omim/300658)*S* | *SALL1S* | [*TMIE*](http://www.ncbi.nlm.nih.gov/omim/607237)*N* |
| *CHD7S* | *DIABLON* | *GIPC3N* | [*KCNQ1*](http://www.ncbi.nlm.nih.gov/omim/607542)*S* | *NF2N* | *SALL4S* | [*TMPRSS3*](http://www.ncbi.nlm.nih.gov/omim/605511)*N* |
| [*CIB2*](http://omim.org/entry/605564)*N* | [*DIAPH1*](http://www.ncbi.nlm.nih.gov/omim/602121)*N* | [*GJB2*](http://www.ncbi.nlm.nih.gov/omim/121011)*N/S* | [*KCNQ4*](http://www.ncbi.nlm.nih.gov/omim/603537)*N* | [*OTOA*](http://www.ncbi.nlm.nih.gov/omim/607038)*N* | *SEC23AS* | [*TNC*](http://www.omim.org/entry/187380)*N* |
| [*CLDN14*](http://www.ncbi.nlm.nih.gov/omim/605608)*N* | *DIAPH3N* | *GJB3N/S* | *KRT9S* | [*OTOF*](http://www.ncbi.nlm.nih.gov/omim/603681)*N* | [*SEMA3E*](http://www.omim.org/entry/608166)*S* | [*TPRN*](http://www.ncbi.nlm.nih.gov/omim/613354)*N* |
| *CLPPS* | [*DSPP*](http://www.ncbi.nlm.nih.gov/omim/125485)*S* | [*GJB6*](http://www.ncbi.nlm.nih.gov/omim/604418)*N* | *LAMA3S* | [*P2RX2*](http://www.omim.org/entry/600844)*N* | [*SERPINB6*](http://omim.org/entry/173321)*N* | [*TRIOBP*](http://www.ncbi.nlm.nih.gov/omim/609761)*N* |
| [*CLRN1*](http://www.ncbi.nlm.nih.gov/omim/606397)*S* | *ECM1U* | *GPR98S* | [*LARS2*](http://omim.org/entry/604544)*S* | *PABPN1S* | [*SIX1*](http://www.omim.org/entry/601205)*N/S* | *TRMUS* |
| [*COCH*](http://www.ncbi.nlm.nih.gov/omim/603196)*N* | [*EDN3*](http://www.ncbi.nlm.nih.gov/omim/131242)*S* | [*GPSM2*](http://omim.org/entry/609245)*S* | [*LHFPL5*](http://www.ncbi.nlm.nih.gov/omim/609427)*N* | [*PAX3*](http://www.ncbi.nlm.nih.gov/omim/606597)*S* | [*SIX5*](http://www.ncbi.nlm.nih.gov/omim/600963)*S* | [*TSPEAR*](http://www.omim.org/entry/612920)*N* |
| [*COL11A1*](http://www.ncbi.nlm.nih.gov/omim/120280)*N/S* | [*EDNRB*](http://www.ncbi.nlm.nih.gov/omim/131244)*S* | *GRHL2N* | [*LOXHD1*](http://www.ncbi.nlm.nih.gov/omim/613072)*N* | [*PCDH15*](http://www.ncbi.nlm.nih.gov/omim/605514)*N/S* | [*SLC17A8*](http://omim.org/entry/607557)*N* | [*USH1C*](http://www.ncbi.nlm.nih.gov/omim/605242)*N/S* |
| [*COL11A2*](http://www.ncbi.nlm.nih.gov/omim/120290)*N/S* | [*ELMOD3*](http://www.omim.org/entry/615427)*N* | [*GRXCR1*](http://www.ncbi.nlm.nih.gov/omim/613283)*N* | *LRTOMTN* | [*PDZD7*](http://www.ncbi.nlm.nih.gov/omim/612971)*N* | [*SLC26A4*](http://www.ncbi.nlm.nih.gov/omim/605646)*N/S* | *USH1GS* |
| [*COL2A1*](http://www.ncbi.nlm.nih.gov/omim/120140)*S* | [*ESPN*](http://www.ncbi.nlm.nih.gov/omim/606351)*N* | *HARSS* | [*MARVELD2*](http://www.ncbi.nlm.nih.gov/omim/610572)*N* | [*PNPT1*](http://omim.org/entry/610316?search=PNPT1&highlight=pnpt1)*N* | [*SLC26A5*](http://www.ncbi.nlm.nih.gov/omim/604943)*N* | [*USH2A*](http://www.ncbi.nlm.nih.gov/omim/276901)*S* |
| [*COL4A3*](http://www.ncbi.nlm.nih.gov/omim/120070)*S* | [*ESRRB*](http://www.ncbi.nlm.nih.gov/omim/602167)*N* | [*HARS2*](http://omim.org/entry/600783)*S* | *MIR96N* | [*POLR1C*](http://www.omim.org/entry/610060)*S* | [*SMPX*](http://omim.org/entry/300226)*N/S* | [*WFS1*](http://www.ncbi.nlm.nih.gov/omim/606201)*N/S* |
| [*COL4A4*](http://www.ncbi.nlm.nih.gov/omim/120131)*S* | [*EYA1*](http://www.ncbi.nlm.nih.gov/omim/601653)*S* | [*HGF*](http://www.ncbi.nlm.nih.gov/omim/142409)*N* | [*MITF*](http://www.ncbi.nlm.nih.gov/omim/156845)*S* | [*POLR1D*](http://www.omim.org/entry/613715)*S* | [*SNAI2*](http://www.ncbi.nlm.nih.gov/omim/602150)*S* | *WHRNN/S* |
| [*COL4A5*](http://www.ncbi.nlm.nih.gov/omim/303630)*S* | [*EYA4*](http://www.ncbi.nlm.nih.gov/omim/603550)*N/S* | *HMX1S* | [*MSRB3*](http://www.ncbi.nlm.nih.gov/omim/613719)*N* | [*POU3F4*](http://www.ncbi.nlm.nih.gov/omim/300039)*N* | [*SOX10*](http://www.ncbi.nlm.nih.gov/omim/602229)*S* | *MT-RNR1N* |
| [*COL4A6*](http://www.omim.org/entry/303631)*N/S* | *FGF3S* | *HOXA2S* | [*MYH14*](http://www.ncbi.nlm.nih.gov/omim/608568)*N/S* | [*POU4F3*](http://www.ncbi.nlm.nih.gov/omim/602460)*N* | [*STRC*](http://www.ncbi.nlm.nih.gov/omim/606440)*N* | *MT-TS1S* |

*N: nonsyndromic hearing loss; S: syndromic hearing loss.
